1 Interactions between discrete events and continuous dynamics in  
2 the regulation of scallops valve opening: insights from a  
3 biophysical model

4 JEAN-MARC GUARINI<sup>1,\*</sup>, JENNIFER COSTON-GUARINI<sup>1</sup>, LUC A. COMEAU<sup>2</sup>

5 <sup>1</sup>*The Entangled Bank Laboratory, 11 Rue Anatole France, F-66650 Banyuls sur Mer, France*

6 <sup>2</sup>*Fisheries and Oceans Canada, Gulf Fisheries Centre, Science Branch, P. O. Box 5030, Moncton, New  
7 Brunswick E1C 9B6, Canada*

8 \*Corresponding Author: [jm.guarini@entangled-bank-lab.org](mailto:jm.guarini@entangled-bank-lab.org); ORCID: 0000 - 0001 - 7468 - 7894

9 **preprint version 1**, submitted<sup>1</sup> to BioRxiv, on *December 25, 2020*

10 **Running title:** Hybrid dynamics of bivalve shell movements

---

<sup>1</sup>This manuscript was compiled with texmaker 5.0.3 under GNU General Public License (GPL)

*PRE-PRINT, version 1*

11 **Abstract.** This study constitutes a first attempt to quantify processes that govern valve gape dynamics  
12 in bivalves. We elected to focus on the scallop, *Pecten maximus*, not only because of its economic im-  
13 portance but also because it has a complex behaviour and high sensitivity to stress, which can be inferred  
14 from valve gape dynamics. The adductor muscle is the primary organ implicated in valve movements.  
15 Scallops, as other bivalves, move their valves sharply to ensure basic physiological functions or to re-  
16 spond to stressing conditions; these sharp events can be perceived as discrete events within a continuous  
17 dynamic. A biophysical model, originally designed for human muscles, was first selected to simulate  
18 the adductor muscle contraction, countering the passive valve opening by the umbo ligament. However,  
19 to maintain the possibility of rapid valve movements, described as typical of bivalves behaviour, it was  
20 necessary to modify the model and propose an original formulation. The resulting hybrid modelling  
21 simulates how valve opening tends to converge continuously toward a stable steady-state angle, while  
22 being interspersed with discrete, sharp closing events, deviating values from this equilibrium. The pa-  
23 rameters of the new model were estimated by optimization using Hall-Effect Sensor valvometry data  
24 recorded in controlled conditions. Equilibrium of the continuous regime (when fiber activation equals  
25 deactivation) was estimated for a gape angle close to *ca.* 15 degrees, which is *ca.* 45% of the maximum  
26 opening angle, hence implying a constant effort produced by the adductor muscle. The distribution of  
27 time intervals between two successive discrete events did not differ significantly from a random process,  
28 but the peak amplitudes deviated from randomness, suggesting they are regulated physiologically. These  
29 results suggest that discrete events interact with continuous dynamic regimes, regulating valve opening  
30 to minimize physiological efforts and conserve energy. However, because the overall physiological state  
31 of the scallop organism conditions the activity of the adductor muscle, a complete understanding of the  
32 physiology of bivalves will require linking a more comprehensive model of valve gape dynamics with  
33 experimental observations of physiological energy consumption under different conditions.

34 **Keywords:** Biophysical Model, Adductor Muscle, Hybrid Model, Stochastic Process, Scallop Behaviour,  
35 EIA

*PRE-PRINT, version 1*

## 36 **1 Introduction**

37 Bivalves open their shells to perform essential physiological functions as respiration, feeding, repro-  
38 duction, and feces expulsion. Bivalve "valvometry" (Marceau 1909; Rao 1954) was developed over a  
39 century as a means to monitor this activity and infer behaviors under different environmental conditions  
40 (see reviews by Kramer et al. 1989; Clements and Comeau 2019). Valvometry became a generic term  
41 which encompasses many different techniques; it started with "sooted glass" techniques (Marceau 1909),  
42 and gained automation with strain gauges (Wilkens 1981), Hall-effect sensors (HES) (Nagai et al. 2006),  
43 impedance electrodes (Tran et al. 2003), and fiber optic sensors (Franck et al. 2007). Because bivalves  
44 close their shell in response to stress, valvometry has been applied not only to study their physiology  
45 (Payton et al. 2017; Comeau et al. 2018) but also to characterize responses to environmental perturba-  
46 tions (Gaine and Shumway 1988; Nagai et al. 2006, Redmond et al. 2017). Valvometers based on HES  
47 have many advantages over other techniques: HES are light, compact and require only one connection  
48 to collect data. However, they require careful implementation to ensure a suitable estimate precision; an  
49 *ad hoc* calibration based on both electromagnetic properties of the sensors and dynamic geometry of the  
50 shell was developed (Guarini et al. 2020) to obtain time series and dynamics indicators of valve gape  
51 variations; it permitted comparisons between data series from individual organisms.

52 Closure of the two valves (shells) occurs in response to contractions of the adductor muscle(s). This  
53 contraction opposes a continuous opening force generated by a ligament located at the umbo (Bayliss et  
54 al. 1930; Trueman 1953). The adductor muscle itself has two parts characterized by two different types  
55 of fibers. The large, striated part of the muscle is responsible for fast movements, while the smaller,  
56 smooth muscle fiber is responsible for slower, sustained and cyclic movements. Wilkens (1981) sug-  
57 gested that this sustained smooth muscle tension exerted against the force of the hinge (umbo) ligament  
58 is the explanation for the half-open position of the valves described as a resting posture. To the best of  
59 our knowledge, however, there are no quantitative studies linking valve gape dynamics to muscle activity,  
60 even if there are many studies on the adductor muscle in bivalves, and especially in scallop species (see  
61 Chandler 2006 for a review).

*PRE-PRINT, version 1*

62 In fact, the vast majority of modelling studies about muscles concern humans. In the late 1930s, Hill  
63 (1938) proposed a first quantification of human muscle dynamics from a bioenergetics point of view.  
64 Currently there are three types of models developed for human physiological studies: biophysical, me-  
65 chanical and biochemical (Ruina 2016). All three are based on a common principle that muscle fibers  
66 are excited by the nervous system and this induces the release of  $\text{Ca}^{2+}$  cations that modify the protein  
67 configurations producing contractions and generating force. These models address the problem of mus-  
68 cle fatigue which results from a decrease in muscle fiber activation and contraction, and a decrease in  
69 the force developed by the muscle. In these models, the relaxation of the muscle after contraction can be  
70 considered either a passive process or active deactivation process in these models.

71 Our global objective is to establish a quantitative framework for interpreting physiological signals ob-  
72 tained from king scallops (*Pecten maximus*) with valvometry. In the present study, a minimal biophysical  
73 system was designed to represent the adductor muscle dynamics and simulates activation, deactivation,  
74 and recuperation processes. This submodel was then used to calculate the forces applied by the muscle  
75 on each valve.

76 To minimize the system of equations, the model was conceived to describe a global adductor muscle  
77 functioning, without distinction between smooth and striated parts. In addition, only continuous changes  
78 interspersed with single events were investigated (as opposed to series of reflex contractions). The model  
79 was used to test hypotheses regarding the underlying processes that govern the passive action of the liga-  
80 ment and the active reactions of the adductor muscle. For achieving these objective, in this article, model  
81 outputs were compared with data collected on scallop individuals equipped with HES valvometers in  
82 tank experiments. Once HES were calibrated with the method we developed in an earlier article (Guarini  
83 et al. 2020), the comparison between time series and simulations were achieved by optimization, allow-  
84 ing unknown parameters to be identified. We then describe statistically robust basis for interpreting *in*  
85 *situ* valvometry time series, including those for which individuals are affected by environmental stres-  
86 sors (e.g., temperature change, eutrophication, harmful algal blooms). General perspectives were drawn  
87 to develop further the model for two different research directions, ecophysiology of bivalves, their mon-  
88 itoring in aquaculture context, and for extending their use as sentinel species in environmental impact

PRE-PRINT, version 1

89 assessment applications.

## 90 **2 Material and Methods**

### 91 **2.1 Modeling the dynamics of the angle of the shell, $\alpha(t)$**

92 To formulate our model, we introduced an angle,  $\alpha$  (in radian) formed by two rays placed on each valve  
93 in such a way that  $\alpha = 0$  when the shell is closed (see Figure 1). The origin (i.e. the angle vertex) is  
94 located at the shell umbo, and the plan formed by the two rays is perpendicular to the axis formed by the  
95 hinge. The dynamic of  $\alpha(t)$  was calculated by integrating the angular velocity,  $v(t)$ , which results from  
96 two forces; the first one is a passive force,  $F_O$  (in Newtons), produced by the tension of a ligament, which  
97 opens the shell. The second one is an active force,  $F_C$  (in Newtons), produced by the adductor muscle,  
98 which closes the shell.

99 The module of the passive opening force,  $F_O$ , which is an elastic restoring force, was considered to be a  
100 linear function of the ligament elongation:

$$F_O \propto \varepsilon(t) \quad (1)$$

101 where  $\varepsilon(t)$  (dimensionless) represents the relative elongation of the ligament, function of the relative  
102 distance of the opening, and expressed as:

$$\varepsilon(t) = 1 - \sqrt{\frac{1 - \cos(\alpha(t))}{1 - \cos(\alpha_{max})}} \quad (2)$$

103 where  $\alpha_{max}$  (in radians) is the maximum opening angle which can be determined experimentally from the  
104 maximum opening distance  $d_{max}$  (in mm). The relative elongation ranges from 0 (when  $\alpha(t) = \alpha_{max}$  and  
105 the shell is fully open) to 1 (when  $\alpha(t) = 0$  and the shell is completely closed). The positions of ‘fully  
106 open’ or ‘fully closed’ are functional definitions from the calibration procedure (Guarini et al. 2020, see  
107 also section 2.3). Angular speed is determined by restoring forces applied and hence is linked to the  
108 quantity of kinetic energy produced. Therefore, the angular speed was expressed as a function of square

*PRE-PRINT, version 1*

109 of the elongation:

$$V_O \propto \varepsilon(t)^2 \quad (3)$$

110 Conversely, the adductor muscle contraction induces a force, which counters the passive opening force  
111 by mobilizing muscle fibers. We assumed that this closing force,  $F_C$ , is a function of the proportion  
112 between the number of activated muscle fibers,  $m_A$ , and the total number of muscle fibers,  $m_T$ :

$$F_C \propto \frac{m_A}{m_T} \quad (4)$$

113 The total number of muscle fibers,  $m_T$  is the sum of three components:  $m_A$ ,  $m_F$  (the number of deactivated  
114 fibers), and  $m_U$  (the number of inactive fibers which can still be mobilized).  $m_T$ , hence the 3 components,  
115 depends on the size of the muscle. To get rid of this dependency,  $m_A$ ,  $m_F$ , and  $m_U$  were divided by  $m_T$   
116 to express the state of the muscle in terms of dimensionless proportions  $p_A$ ,  $p_F$ , and  $p_U$ , respectively. It  
117 has been proposed that the dynamics of the muscle can be simulated by a biophysical model (Liu et al.  
118 2002; Böl et al. 2011; Looft et al. 2018):

$$\begin{cases} p_U &= 1 - p_A - p_F \\ \dot{p}_A &= ap_U - sp_A + rp_F \\ \dot{p}_F &= sp_A - rp_F \end{cases} \quad (5)$$

119 where  $a$  is the activation rate,  $s$  is the deactivation rate, and  $r$  is the recovery rate (all in  $t^{-1}$ ). According  
120 to Hill (1938), the speed of muscle shortening due to contraction of muscle fibers is a linear function of  
121 the closing speed:

$$V_C \propto p_A \quad (6)$$

122 Thus, the resulting dynamics of angle opening,  $\alpha(t)$ , combining equations and [3] and [6], was expressed  
123 as:

$$\dot{\alpha}(t) = K((\varepsilon(t))^2 - Qp_A) \quad (7)$$

124 where  $K$  and  $Q$  are two parameters which need to be estimated. It remains difficult to provide a physio-

PRE-PRINT, version 1

125 logical, or even a mechanistic, meaning for these two parameters. However, from a mathematical point  
126 of view,  $K$ , has a dimension of angular velocity ( $radian.t^{-1}$ ), and  $Q$  (dimensionless) represents a scaling  
127 factor between two dimensionless variables: 1) the relative ligament elongation and 2) the proportion of  
128 active fibers in the adductor muscle.

## 129 2.2 Simulation of valve-gape angle dynamics.

130 Shell valve movements are characterized by alternating series of opening and closing events. The opening  
131 event is considered to be passive and it does not require muscle fibers to be activated. It can be assumed  
132 that the organism controls the opening event by decreasing the activation rate,  $a$ . In contrast, closing of  
133 the shell is an active event, and activation of available muscle fibers is required. For fast closing events  
134 (identified by discrete closing peaks), we hypothesized that all available fibers (represented by  $p_U$ ) are  
135 mobilized at once to close the shell. The corresponding discrete transition system of this model was  
136 represented by:

$$\left\{ \begin{array}{l} \alpha(t) \leftarrow \max(\alpha(t) - KQp_A(t), 0) \\ p_A(t) \leftarrow p_A(t) + p_U(t) \\ p_U(t) \leftarrow 0 \\ p_F(t) \leftarrow p_F(t) \end{array} \right. \quad (8)$$

## 137 2.3 Data acquisition and calibration of sensors

138 Experiments were conducted on king scallops (*Pecten maximus*) in April 2018. Twelve *Pecten maximus*  
139 individuals were collected in the Bay of Brest (Western Brittany, France) at depths between 10 and 15 m.  
140 Their size were close to each other (their average maximum length, from umbo to the edge, was equal  
141 to  $10.18 \pm 0.25$  (SE) cm). Shells were cleaned of epibionts, and were placed in holding tanks ( $7.3 \times$   
142  $6.2 \times 4.2 dm^3$ ). Water in the tanks was continuously renewed at a constant flow rate of  $15 dm^3.h^{-1}$  with  
143 filtered seawater from the Bay. During this period, the scallops received a daily suspension of *Isochrysis*  
144 *galbana* (ca.  $1L.h^{-1}$  at ca.  $17.10^9 cells.L^{-1}$ ). Artificial light was produced by light emitting diodes at a  
145 color temperature of 4500 K and with a periodic cycle of 12h light (from 8:00 am to 8:00 pm) and 12h

*PRE-PRINT, version 1*

146 dark. After a two-week acclimation period, scallop individuals were equipped with a Hall Effect Sensor  
147 (HW-300a, Asahi Kasei, Japan) according to a protocol designed by Wilson et al. (2005). One HES,  
148 sealed in epoxy resin, was glued along the axis of maximum length, in a position close to the edge of the  
149 flat valve; the average distance between the HES and umbo was  $9.55 \pm 0.25$  (SE) cm. The HES was then  
150 connected to a data logger (Smart Dynamic Strain Recorder, DC204R, Tokyo Sokki Kenkyujo Company,  
151 Japan). A small neodymium magnet (diameter, 4.8 mm; thickness, 0.8 mm) was glued on the opposite  
152 curved valve surface directly below the sensor. Hall voltage was checked while the shell was still closed;  
153 a second magnet was added when needed, to set the Hall voltage closer to the maximum value. Total  
154 handling time was less than 25 min. Two sets of six scallops were placed in experimental tanks with  
155 filtered circulating sea water and the Hall voltages recorded at a frequency of 10 Hz for 7 – 8 days. At  
156 the end of the experiment, a calibration curve was generated for each scallop by measuring the voltage  
157 produced at 14 different known inter-valve distance values, after the adductor muscle was severed. This  
158 is done by inserting a series of glass wedges between the two valves at the point farthest from the umbo.  
159 Finally, HES measurements were recorded when the shells were fully closed and fully open. These data  
160 were used to create a calibration curve for each individual scallop. Both the experiments and the data  
161 collected are also described in an earlier article (Guarini et al. 2020)

162 The measurement of the Hall-effect voltage is proportional to the magnetic field intensity,  $B$ , which varies  
163 as a function of the inverse of the square of the distance between the HES and the magnet,  $D_e$  (in mm)  
164 and, because of the rotation of the shell around the hinge, is a function of  $\kappa$  the angle between the axis  
165 of the magnetic field and the axis between the HES and the magnet surface (Figure 1). Therefore, the  
166 distance between the HES and the magnet was calculated as:

$$D_e(t) \propto \sqrt{\frac{1}{B(t) \cos(\kappa(t))}} \quad (9)$$

167 The interval distance,  $d(t)$  (in mm), was calculated from the estimates of  $D_e(t)$  and the fix distance,  $d_0$



PRE-PRINT, version 1

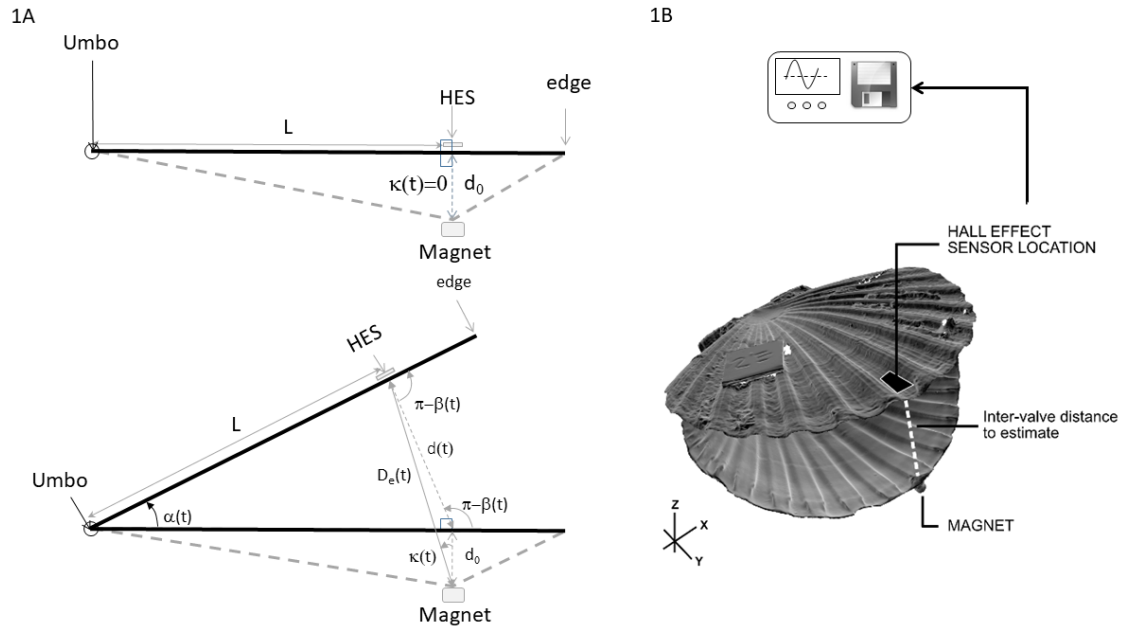

**Figure 1:** Hall-Effect experimental setup (A) Geometric representation of a cross-section of a *Pecten maximus* shell showing the point of placement of the Hall-effect sensor (HES) on the flat upper valve and the magnet on the curved lower valve. (B) Schematic of a scallop (*Pecten maximus*) shell showing the placement of the Hall-effect sensor (HES) on the flat valve and the magnet on the curved valve.

168 (in mm), between the magnet and the HES when the shell is closed:

$$d(t) = \sqrt{D_e(t)^2 + d_0^2 - 2D_e(t)d_0 \cos(\kappa(t))} \quad (10)$$

169 From the calculation of  $d(t)$ , we calculated the gape angle  $\alpha(t)$  (in  $\text{radian} \cdot \text{s}^{-1}$ ) as

$$\alpha(t) = \arccos\left(1 - \frac{d(t)^2}{2L^2}\right) \quad (11)$$

170 which, for presenting results, were converted in degree by multiplying the right term by  $\frac{180}{\pi}$

PRE-PRINT, version 1

## 171 3 Results

### 172 3.1 Mathematical properties of the adductor muscle dynamics model

173 The opening process, which was formulated in equations [1], [2], and [3] and expressed in [7], takes into  
174 account mechanical limits of shell valve opening. The relative opening force is null when the shell is  
175 fully open ( $\alpha(t) = \alpha_{max}$ ) and is maximum, equal to 1, when the shell is closed ( $\alpha(t) = 0$ ). The equation  
176 [7] is at equilibrium if  $\dot{\alpha}(t) = 0$ , hence if  $\varepsilon(t)^2 = Qp_A$ . It is expressed as:

$$\alpha^* = \cos^{-1}(1 - \zeta^2(1 - \sqrt{Qp_A^*})^2) \quad (12)$$

177 where  $\zeta = \sqrt{1 - \cos(\alpha_{max})}$ ,  $\alpha^*$  is the gape angle equilibrium value (i.e., resting-state) and  $p_A^*$  is the  
178 equilibrium-state value of the proportion of fibers activated in the smooth part of the adductor muscle.  
179  $\alpha^*$  is bounded by  $\alpha^* \in [\cos^{-1}(-1), \alpha_{max}]$ .

180 The calculation of  $p_A^*$  is given by the analytical integration of [5]. The general solution is:

$$\begin{cases} p_U &= Ae^{-at} \\ p_A &= Be^{-(s+r)t} + Ce^{-at} + \frac{r}{s+r} \\ p_F &= De^{-(s+r)t} + De^{-at} + \frac{s}{s+r} \end{cases} \quad (13)$$

181 where A, B, C, and D are constants, depending on the parameters and initial values for  $p_A$  and  $p_F$ .

182 Consequently, the non-trivial stable equilibrium solution does not depend on initial conditions:

$$\left\{ p_U^* = 0, p_A^* = \frac{r}{s+r}, p_F^* = \frac{s}{s+r} \right\} \quad (14)$$

183 This solution states that, at equilibrium, all muscle fibers are either activated (hence pull valves to close  
184 the shell) or deactivated. This constituted a fundamental issue since discrete closing events could not

PRE-PRINT, version 1

185 occur any longer in this configuration. In order to solve this problem, the model was revised as:

$$\begin{cases} \dot{p}_U &= rp_F - ap_U \\ \dot{p}_A &= ap_U - sp_A \\ \dot{p}_F &= sp_A - rp_F \end{cases} \quad (15)$$

186 The non-trivial equilibrium of [15] is:

$$\left\{ p_U^* = \frac{rs}{rs + as + ar}, p_A^* = \frac{ar}{rs + as + ar}, p_F^* = \frac{as}{rs + as + ar} \right\} \quad (16)$$

187 When equation [16] is introduced into equation [7], the opening angle at equilibrium can be determined  
188 as:

$$\alpha^* = \cos^{-1} \left( 1 - \zeta^2 \left( 1 - \sqrt{Q \frac{ar}{rs + as + ar}} \right)^2 \right) \quad (17)$$

189 where  $\alpha_{max}$  is measured and  $\zeta = \sqrt{1 - \cos(\alpha_{max})}$ . The parameters  $\{Q, r, s, a\} \in \mathbb{R}^{+*4}$  must be identified.

190 A series of three simulations were performed to illustrate the dynamics simulated by the model (Equa-  
191 tions 7, 8 and 15; Figures 2 and 3). Parameters and initial conditions were set as identical for the three  
192 simulations ( $\{a = 0.0015, s = 0.0015, r = 0.0007, K = 50, Q = 0.74\}$ , with r and Q being calculated in  
193 such a way that  $\alpha_{max}$  and  $\alpha^*$  were equal to 30 and 15 degrees respectively). The three numerical simula-  
194 tions were performed at 10 Hz (dt = 0.1 s). The first simulation (Figure 2, upper graph) shows that with  
195 constant time duration between two events (fixed at 30 min), the dynamics are characterized by a series  
196 of identical closing peaks, all of which have the same intensity. When the period fluctuates randomly  
197 (second simulation, Figure 1, lower graph), while parameters remain constant and identical to the first  
198 simulation, closure peaks with different intensities characterized the dynamics. Therefore, these changes  
199 in peak intensities are only the consequences of the random duration between peaks. Finally, a series of  
200 very short, random durations between two closing events were examined (Figure 2). For this third simu-  
201 lation, we set T to fluctuate randomly, but we simulated a series of short closing events occurring between  
202 ca. 1.0 and 2.0 h; the expectation of the duration between two events decreased from 30 minutes to 1  
203 minute during this time window. This created dynamics, which tended to deviate from the equilibrium

PRE-PRINT, version 1

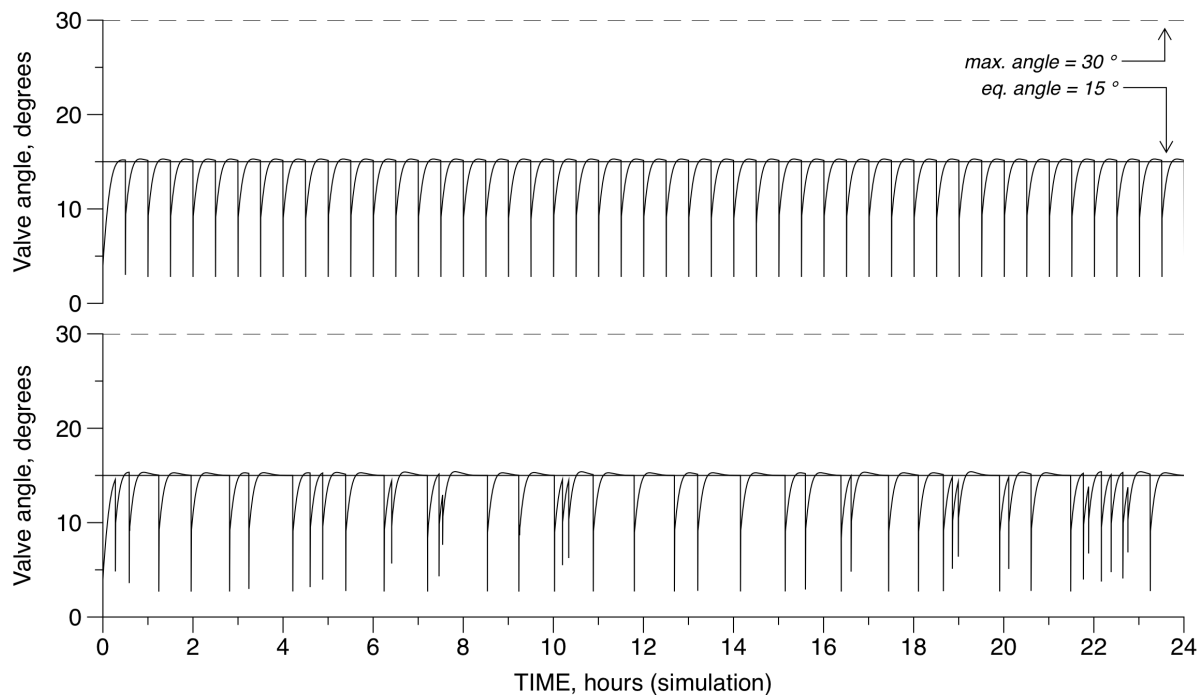

**Figure 2:** Two simulations performed with the same set of parameters and initial conditions. Parameters were fixed arbitrarily for the three simulations:  $\{a = 0.0015, s = 0.0015, r = 0.0007, K = 50, Q = 0.74\}$ , with  $r$  and  $Q$  being calculated in such a way that  $\alpha_{max}$  and  $\alpha^*$  were equal 30 and 15 degrees respectively. Horizontal lines represent the equilibrium, “resting” angle (in degrees), and the maximum opening angle (in degrees). The upper graph shows what data would look like from a model simulating an identical duration between two closing events (30 min). The lower graph presents a data series obtained with the model simulating randomly variable durations (expectation is set equal to 30 min) between two closing events.

*PRE-PRINT, version 1*

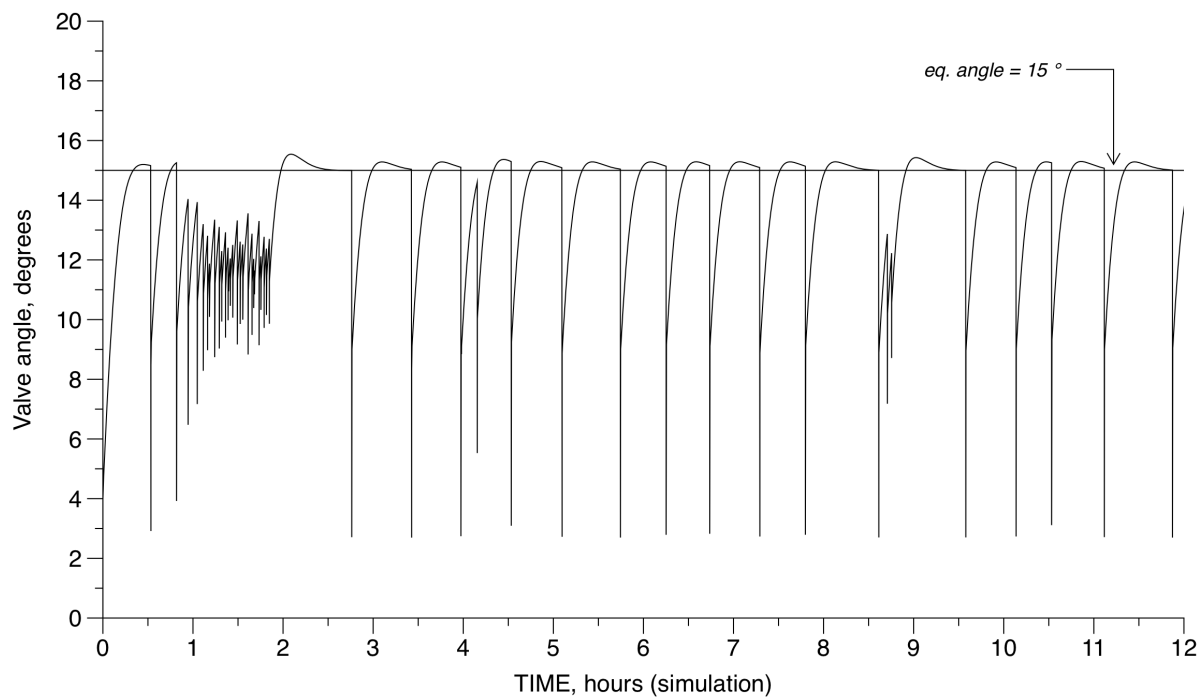

**Figure 3:** Simulation performed with the same set of parameters and initial conditions as Figure 2. The horizontal line at  $15^\circ$  represents the equilibrium, or “resting” angle. The model simulated randomly variable durations between two closing events, but the expectation decreased from 30 minutes to 1 minutes between ca. 1 and 2 hours, representing a stressful event. It resulted in a period of a sustained effort. The dynamics overpass the equilibrium angle value after events of contraction, proportional to the duration of contraction and the time to return to the equilibrium.

*PRE-PRINT, version 1*

204 value. All of our simulations showed a slightly larger opening event prior to a return to equilibrium.  
205 This is because the model [16] behaves like an over-damped oscillator. The amplitude of this damped  
206 oscillation depends on the intensity and duration of the contraction as well as on the speed of return to an  
207 equilibrium; it simulates a short-term muscle fatigue which leads to a slightly larger opening angle prior  
208 to the return to an equilibrium value during a recovery period.

### 209 **3.2 Assessing individual variability**

210 Figure 4 shows two examples of recorded time series both exhibiting discrete events during their contin-  
211 uous dynamics; the upper part corresponds to specimens 4 and the lower part, to specimen 9; specimens  
212 4 and 9 were selected randomly from the experimental group in (Guarini et al. 2020). We kept on using  
213 them as examples for more detailed description and discussion in the following sections. The results of  
214 the data analysis for all specimen are presented in Table 1; note that data recordings from three speci-  
215 mens, 7, 8 and 10 were not analysed because of excessive variability (in 7 and 8) and errors (in 10) in  
216 writing the data file (Guarini et al. 2020).

217 A total of 307 and 318 closing peaks were identified for specimens 4 and 9, respectively. The closing  
218 event rate,  $\rho$  (in  $h^{-1}$ ) was estimated to be equal to  $0.47 h^{-1}$  (specimen 4) and  $0.38 h^{-1}$  (specimen  
219 9). For each of the graphs in figure 4 are presented the observed angle variations estimated from the  
220 HES calibration (for each individual), the average angle value (solid horizontal line) and the maximum  
221 angle value (dashed horizontal line, estimated from the maximum valve gape distance measured after  
222 the adductor muscle was severed). The estimated boundaries of the closing peaks are presented with  
223 the starting upper values (unfilled triangles) and the ending lower values (filled triangles) which were  
224 estimated using the fitting procedure described in this article. The average angle values were equal to  
225  $12.74^\circ$  and  $12.59^\circ$  for specimens 4 and 9, respectively. The measured maximum opening angle values  
226 were  $33.35^\circ$  and  $29.85^\circ$ , respectively (Table 1).

227 The second step consisted of identifying the parameters  $\{K, Q\}$ , from system [16] with transition [17].  
228 We were not able to identify all four parameters  $\{K, Q, r, s, a\}$  because there is no quantitative information  
229 available about the functioning of the muscle fibers.  $\{K, Q\}$  were estimated from equation [17] by fixing

PRE-PRINT, version 1

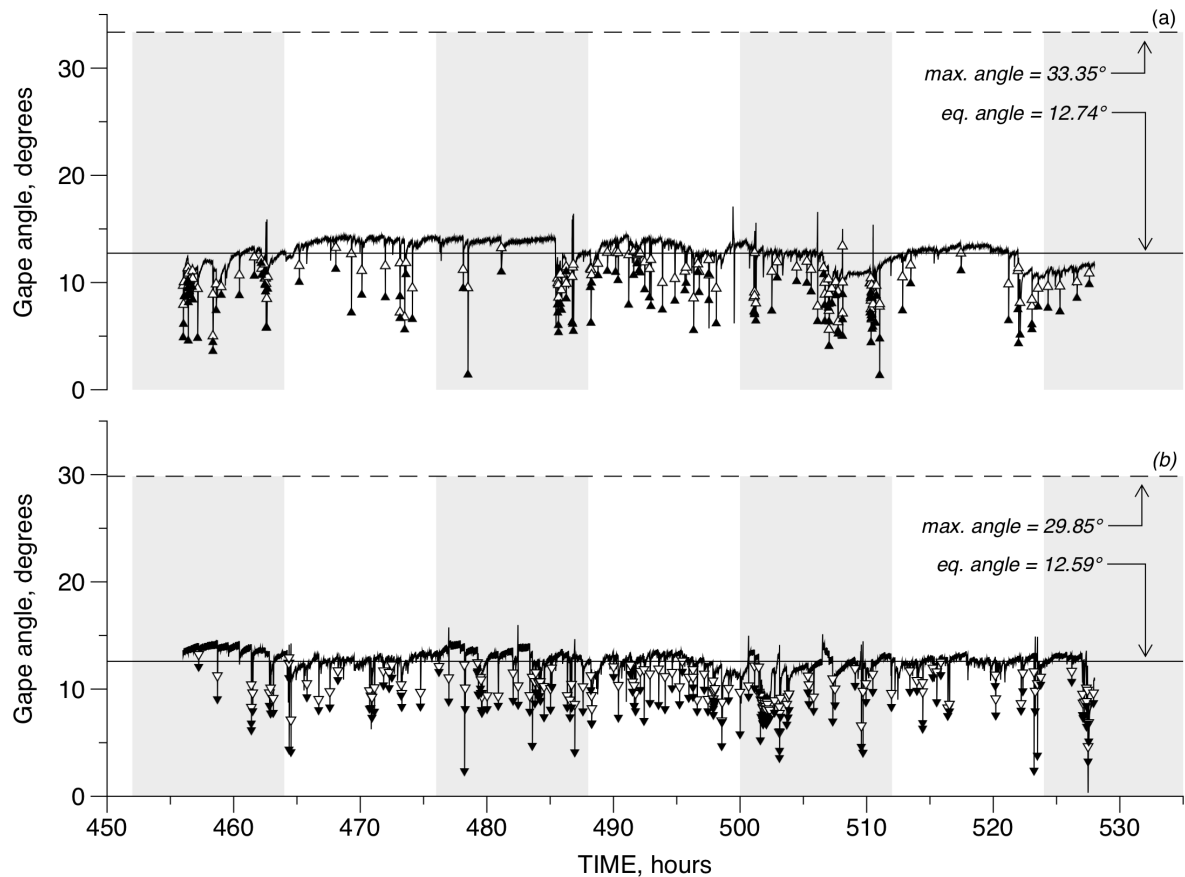

**Figure 4:** Two different observed HES valve gape time series converted to changes in gape angle for specimens 4 (upper panel, a) and 9 (lower panel, b). The dashed line is the maximum gape angle amplitude,  $\alpha_{max}$ , obtained from calibrations after the adductor muscle was severed. The solid line shows the average gape angle calculated from the estimated time series. The triangles (up for specimen 4, down for specimen 9) indicate where the fitting procedure identified a peak start (empty symbols) and an event peak (filled symbols) for discrete events in each series. The alternating gray blocks indicate the 12 hour dark-light periods in the experimental tanks.

PRE-PRINT, version 1

**Table 1** Parameters of the adductor muscle activity dynamics and the resulting valve opening angle.  $\alpha_{max}$  and  $\alpha^*$  are in degree, K in degree per second ( $^{\circ}.s^{-1}$ ), Q is a dimensionless scaling factor between opposite forces exercised by the ligament and the adductor muscle.  $\rho$  is a rate of occurrence between two discrete closing events ( $h^{-1}$ ), Peaks represents the number of peaks identified in the time series measured by the Hall-effect valvometer.  $\chi^2$  is the value calculated to test differences in the distribution of the duration,  $\tau$ , between two discrete closing events, as observed with the Hall-effect valvometer and as simulated with a pure stochastic process. d.o.f. is the degree of freedom corresponding to the calculation of  $\chi^2$ , used to compare these values with a critical value obtained from a table, when fixing the p-value.

| Specimen | $\alpha_{max}$           | $\alpha^*$ | K     | Q    | $\rho$ | Peaks | $\chi^2$ | d.o.f. |
|----------|--------------------------|------------|-------|------|--------|-------|----------|--------|
| 1        | 29.85                    | 14.43      | 14.75 | 0.79 | 0.35   | 417   | 8.53     | 9      |
| 2        | 37.16                    | 14.56      | 16.47 | 0.92 | 0.45   | 322   | 16.33    | 9      |
| 3        | 36.28                    | 17.85      | 25.07 | 0.76 | 0.36   | 396   | 9.27     | 9      |
| 4        | 33.35                    | 13.74      | 15.25 | 0.92 | 0.47   | 307   | 11.09    | 9      |
| 5        | 29.85                    | 15.02      | 11.99 | 0.73 | 0.31   | 381   | 15.52    | 9      |
| 6        | 37.16                    | 19.85      | 39.93 | 0.63 | 0.08   | 1439  | 16.13    | 9      |
| 7        | <i>excess noise</i>      |            |       |      |        |       |          |        |
| 8        | <i>excess noise</i>      |            |       |      |        |       |          |        |
| 9        | 29.85                    | 12.63      | 12.67 | 1.01 | 0.38   | 318   | 10.97    | 9      |
| 10       | <i>data write errors</i> |            |       |      |        |       |          |        |
| 11       | 36.28                    | 13.93      | 17.05 | 0.97 | 0.31   | 382   | 10.41    | 9      |
| 12       | 33.35                    | 17.08      | 14.78 | 0.70 | 0.64   | 148   | 9.13     | 9      |

230  $\{r, s, a\}$  at a constant value equal to 0.0015; this was estimated for the 9 available observed time series  
 231 by minimizing the squared differences between the estimated and corresponding calculated beginning  
 232 and end values of the peaks, between days 2 and day 6 (Table 1). A direct search algorithm (Nelder  
 233 and Mead, 1965) was used to do the minimization of the least squares criterion (Table 1). From these  
 234 parameter estimates,  $\alpha^*$  was calculated (equation 17).  $\alpha^*$ , which corresponds to the equilibrium value  
 235 toward which the continuous model (equation 7) converges asymptotically, is different from the average  
 236 angle estimates, which is calculated from all estimated angle of the observed data series. Figure 4 shows  
 237 the simulations regarding the observations, after being optimized to the identified peaks. Parameters, K  
 238 and Q, were equal to  $15.25^{\circ}.s^{-1}$  and  $0.92^{\circ}.s^{-1}$  for specimen 4, respectively (Figure 4, upper graph),  
 239 and were  $12.67^{\circ}.s^{-1}$  and  $1.01^{\circ}.s^{-1}$  for specimen 9 (Figure 4, lower graph), respectively. For specimen  
 240 4, the equilibrium angle ( $\alpha^* = 13.74^{\circ}$ ) of the simulated series surpassed frequently the average opening  
 241 angle value of the observed series. However, for specimen 9, the equilibrium angle ( $\alpha^* = 12.63^{\circ}$ ) of  
 242 the simulated series remained very close to the average opening value of the observed series. For both



*PRE-PRINT, version 1*

243 example specimens, periods of high frequency occurrences of closing events (at 455, 485 and 505 hours,  
244 for specimen 4 and at 500 hours for specimen 9) were associated with lower valve gape openings. In the  
245 case of specimen 4, a period of lower valve gape opening, at 520 hours, without a higher frequency was  
246 observed.

247 Figure 5 shows that the simulated results approximated the observation data, but closure peak estimates  
248 were often smaller than the overall observations. In addition, the simulations showed more regularity  
249 in closure peak amplitude than the observations for both specimens. The simulations represented well  
250 the decreases of valve gape angle amplitude and maximum values when the peak occurrence frequency  
251 increased.

252 Parameter values in Table 1 indicate the estimated angles of  $\alpha_{max}$  can vary from 29.85° (specimen 1) to  
253 37.16° (specimen 6), with an average value of 33.68° among the nine individuals.

254 The equilibrium opening angle  $\alpha^*$  varied from 12.63° (specimen 9) to 19.85° (specimen 6), with an  
255 average value of 15.45°. The number of identified closing peaks and related  $\rho$  values varied from 148  
256 peaks and 0.64  $h^{-1}$  (specimen 12) to 1439 peaks and 0.08  $h^{-1}$  (specimen 6). The values for specimens  
257 12 and 6 differed greatly from the other seven specimens which had average values of 360 peaks and  $\rho =$   
258 0.38  $h^{-1}$ , respectively. In addition, for these seven specimens, the values of K varied from 11.99  $deg.s^{-1}$   
259 (specimen 5) to 25.07  $deg.s^{-1}$  (specimen 3), with an average value of 16.18  $deg.s^{-1}$ . For the scaling  
260 factor Q, the values varied from 0.63 (specimen 6) to 1.01 (specimen 9), with an average value of 0.82.

261 In our approach, the occurrence of discrete events was assumed to be determined externally; this means  
262 that they were not triggered by the state of the continuous dynamics. The discrete dynamics can then be  
263 considered as a series of transitions between continuous periods. The occurrences of these transitions  
264 were tested to determine if they were spaced randomly. The observed time series were thus compared  
265 to a stochastic process defined as null models. These null models were designed to simulate random  
266 series of discrete events with an average occurrence rate,  $\bar{\rho}$  (in  $h^{-1}$ ), calculated from the corresponding

*PRE-PRINT, version 1*

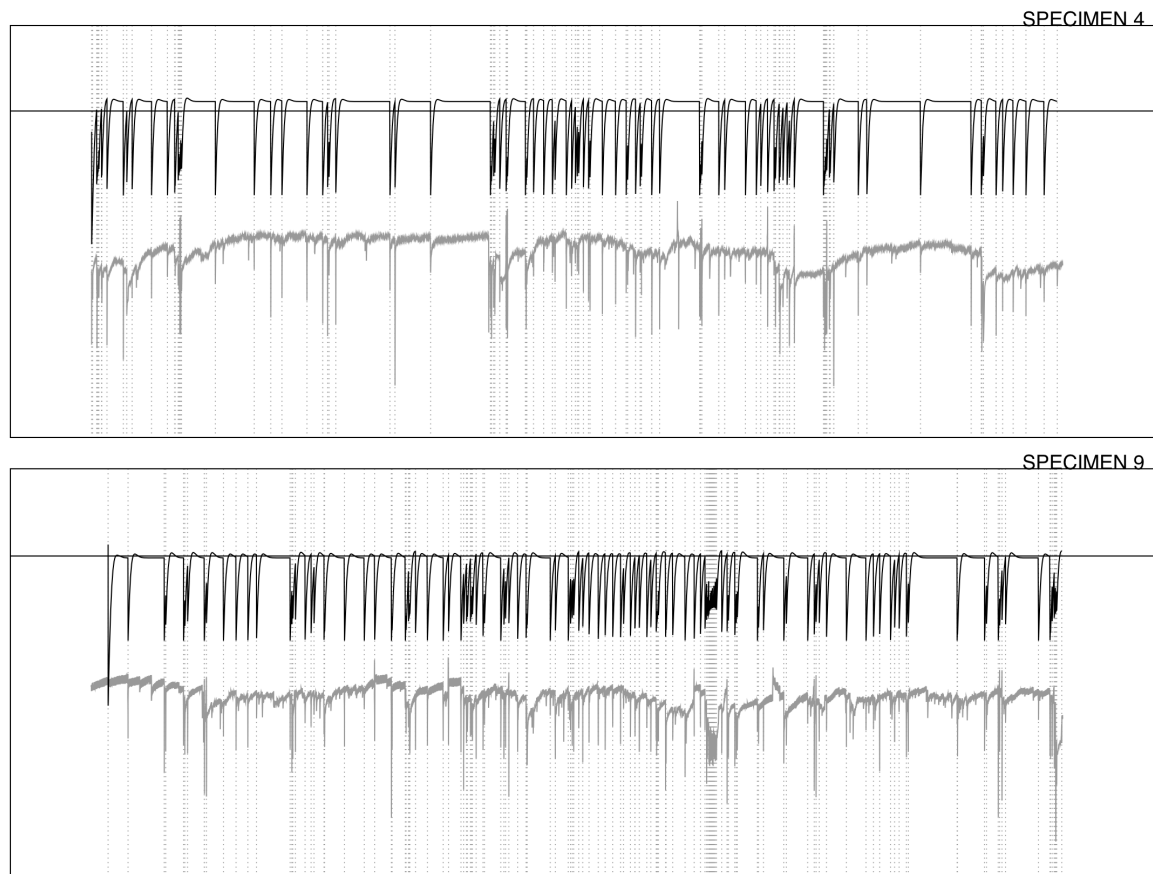

**Figure 5:** Qualitative comparison of the simulated and observed valve gape dynamics for specimens 4 (upper panel) and 9 (lower panel). The black lines are the simulated series for the respective individuals. Below this are the data series in light gray. Simulated series were performed by optimization of an ordinary least square criterion, identifying parameters  $Q$  and  $K$  ( $a$ ,  $r$ ,  $s$  being fixed at 0.0015). The optimization was performed on peaks occurrence only (their placement is indicated by the vertical dashed lines). The horizontal, solid lines indicate the resting gape angle calculated from parameter values ( $\alpha_{max}$ ), characteristic of the equilibrium state in the adductor muscular fibers.

*PRE-PRINT, version 1*

267 observations. The time  $\tau$  (in h) between two discrete events was calculated as:

$$\tau = \frac{\ln(p \in ]0, 1[)}{\bar{\rho}} \quad (18)$$

268 where  $p \in ]0, 1[$  is a uniformly distributed probability; consequently,  $\tau$  follows the exponential law,  
269  $f(\tau, \rho)$ . Comparisons between the observed and null distributions were made with a Pearson's  $\chi^2$  test.  
270 The degree of freedom was fixed to 9 (optimal number of classes - 1) and the first-type error was fixed at  
271 0.05.  $\chi^2$  values were found to vary between 8.53 (specimen 1) and 16.33 (specimen 2). With a critical  
272 value  $\chi_c^2 = 16.92$ , the distributions of the time intervals between any two events could not be distin-  
273 guished from pure stochastic processes with a confidence of 0.95. Specimens 2, 5, and 6, for which  
274  $\chi^2$  values approached  $\chi_c^2$ , all had short periods of rapid shell clap sequences that induce an increased  
275 number of short duration closures in the series.

## 276 **4 Discussion**

### 277 **4.1 The opening angle: a non-measurable, yet indispensable, variable**

278 The angle  $\alpha$  is the central variable used in our study. It is calculated from the valve gape distance which  
279 is estimated from the HES protocol. It is used in valvometry studies (e.g. Comeau et al. 2012) because  
280 it standardizes the dimensions associated with the valve opening process. Thus the valve gape angle, on  
281 the contrary of the valve gape distance, is assumed to be independent from the shell size, which may  
282 increase over long experimental time.

283 The variations of the opening angle,  $\alpha$ , were expressed as a function of the forces applied to the shell  
284 valves. In our study, we have consistently taken into account, in all our estimate calculations, the fact  
285 that bivalve shells rotate around their hinge axis. These angular forces include the passive action of the  
286 ligament and the active effort produced by the adductor muscle. The force produced by the contraction  
287 of the muscle is a function of the physiological energy spent by the organism, hence depends on its  
288 physiological condition. In our modelling framework, parameter identification depends on the estimated

*PRE-PRINT, version 1*

289 values of the opening angles  $\alpha$  with a particular realization,  $\alpha_{max}$ . However, the opening angle,  $\alpha$ , is not  
290 measurable; it is estimated from valvometry data, acquired by the HES. The opening angle is a geometric  
291 construction of a triangle and thus defined by the angle between three vertices of the shell. One vertex  
292 is located near the umbo, on the virtual axis of rotation for the valves. The two other vertices are both  
293 determined by the positions of the HES. One of these two positions is mobile (position of the HES when  
294 it moves) and the other is a fix point, corresponding to the position of the HES when the shell is closed  
295 (Figure 1A). The three vertices define an isocetes triangle, because two vertices are defined by the HES  
296 positions. In all our calculations, the quality of the resulting  $\alpha$  estimates depends on the accuracy of  
297 the position of the HES regarding to the umbo and the magnet; unbiased and accurate estimates are  
298 achieved when the HES and the magnet are perfectly aligned when the valves are closed. Therefore,  
299 errors in the positioning of the HES and the magnet and the measurements of these positions generate  
300 biases in calculations of  $\alpha$ , the forces applied, and related estimators. As there were no means to verify  
301 this assumption *a posteriori*, all values presented here depend on the respect of this alignment during  
302 the preparation of the experiment. We recommend for future study to equip each individual with two  
303 different HES sensors, in order to investigate possible problems of positioning and functioning.

## 304 **4.2 Modeling the opening angle dynamics**

305 There are many studies of the adductor muscle in bivalves, but we did not find any quantitative studies  
306 that linked muscle activity and angle opening dynamics. In our study, we chose to simulate the dynamics  
307 of the opening angle as a function of the variations in smooth muscle activity. Two parameters of the  
308 opening angle dynamics in equation [16], K and Q, were estimated by optimization (minimizing the  
309 distance between simulations and experimental observations). K is an angular velocity ( $.s^{-1}$ ), while Q is  
310 a (unitless) scaling factor between the opposite forces produced by the ligament and the adductor muscle.  
311 Based on our analysis of the muscle contraction model, we found that the continuous dynamics are char-  
312 acterized by a constant convergence to a non-trivial stable equilibrium state, which depends on the values  
313 of the parameters Q,a,r,s and on the maximum opening angle  $\alpha_{max}$ . This equilibrium is then understood  
314 as the balance between the passive opening force (*i.e.*, produced by the elongation of the ligament, and

*PRE-PRINT, version 1*

315 an active force (*i.e.*, produced by the contraction of the adductor muscle. Under the equilibrium state  
316 condition, there is also a balance between the processes of activation, de-activation, and recuperation  
317 of the muscle fibers. The equilibrium opening angle therefore depends on the capacities of an individ-  
318 ual scallop to maintain a fraction of the muscle fibers activated. If the individual cannot maintain this  
319 condition, the shell opens to reach the maximum gape value, close to  $\alpha_{max}$ .

320 The model presented was designed to simulate the gape variations of the valves and explain the dynamics  
321 of shell opening in terms of its mechanical properties. However, the biophysical parameters of the  
322 adductor muscle submodel remain unidentifiable; by this we meant that their values cannot be estimated  
323 by optimization only without acquiring specific information regarding the activity and physiological  
324 state of the organism. Therefore, we fixed the parameters  $\{a, r, s\}$  in order to estimate the two other  
325 parameters (K and Q) of the main differential equation. The parameters  $\{a, r, s\}$ , however, are supposed  
326 to change with environmental conditions (*e.g.* temperature, oxygen concentration ...) and physiological  
327 conditions (MacDonald et al. 2006). In our model framework then, each parameter can be replaced by a  
328 function describing environmental variables that may affect the processes that they control. If ancillary  
329 measurements and complementary experiments were to become available, the model framework here  
330 would be well-suited to identifying and quantifying the related processes.

331 Our model also accounted for discrete events. One of the major issues addressed in our development was  
332 the revision of the muscle dynamics submodel to allow discrete events to occur (see section 3.1). This is  
333 an important goal for any applications of our framework because aquatic organisms are subject to many  
334 different types of short, transient natural and anthropogenic events (*e.g.* ambient noise, turbidity plumes,  
335 salinity drops, toxic algal blooms ...) that interact with longer, seasonal environmental and biological  
336 cycles. The formulation originally developed by Liu et al. (2002) as a generic model for human muscles  
337 was unable to simulate the occurrence of discrete events in mollusk valves dynamics once equilibrium  
338 states were achieved.

339 Discrete closing events were considered to be the result of an external control. They could be determined  
340 internally as a function of the state variables of the continuous model. We found that the time between

*PRE-PRINT, version 1*

341 two discrete events cannot be differentiated from a random process, in all our observations. This was  
342 not the case for the amplitude of the peaks, which did not follow this pattern. These remarks suggest  
343 that we reached some limits in our study to understand the valves dynamics physiologically. On the one  
344 hand, some estimators (like amplitude) could have been determined more accurately, but on the other  
345 hand, the functioning of the smooth adductor muscle is complex, and may involve interactions between  
346 several processes, producing a random-like pattern. In particular, the smooth adductor muscle is able  
347 to perform two kinds of contractions, tonic and phasic. As a result, sustained effort with low energy  
348 consumption is achieved, maintaining a capacity to perform rapid, dynamic contractions with controlled  
349 intensity (Chandler 2006). By linking the muscle activity to nervous stimuli and by establishing energetic  
350 cost within a context of adaptive strategy (Guderley and Portner 2010), the capacity of an organism to  
351 react internal conditions, as well as to its surrounding environment, could be determined. Interestingly,  
352 the energetic cost of valve movement (which can be estimated from the forces) has never been treated in  
353 any bioenergy budget model. Energy management, from uptakes to utilization, should be investigated by  
354 integrating different functions and behaviors of the scallop (MacDonald et al. 2006).

355 The model still only partially reproduces the variability of the observed hybrid dynamics. A more com-  
356 prehensive eco-physiological model which includes adequate observations about muscle activity and  
357 other physiological functions, as well as corresponding stimulations of the nervous system, is now re-  
358 quired to advance further. In particular, the perceived stochastic nature of discrete closing events, their  
359 control (internal and external) and their energetic cost function of the physiological state of the organism  
360 should all be determined.

### 361 **4.3 Smooth versus striated muscle dynamics and micro-contractions**

362 Bayliss (1930) and Wilkens (1981) first described differential dynamics of the smooth and striated parts  
363 of the adductor muscle. The nervous system that controls the adductor muscle has the task of managing  
364 both the smooth muscle fibers for sustained effort and striated muscle fibers for fast transient responses  
365 (Wilkens 2006). In addition to single closing events, fast shell clappings over short periods, to swim,  
366 rotate or bury in the sediment, are related to the activity of the striated muscle fibers (Wilkens, 2006).

*PRE-PRINT, version 1*

367 However, a formalization of these reflex-contractions and its integration within the continuous dynamic  
368 regime appeared to be difficult to achieve. The first problem was that it cannot be simulated by the same  
369 system of equations as [15] because reflex-type dynamics cannot not be represented by such processes.  
370 A model that includes both contraction and relaxation cycles is required. There are many existing func-  
371 tions which can fulfill these properties, and they are generally represented by second order differential  
372 equations. For example:

$$\ddot{x} - k(1 - x^2)\dot{x} + cx = 0 \quad (19)$$

373 which can be decomposed, introducing  $y = x$  and  $z = \dot{x}$  as a system of two first order equations:

$$\begin{cases} \dot{y} = z \\ \dot{z} = k(1 - y^2)z - cy \end{cases} \quad (20)$$

374 where  $k$  and  $c$  are two parameters, and  $y$  the state of muscle (contraction or relaxation) and  $z$  represent  
375 the changing rate. The system describing variations of  $y$  and  $z$  simulate an oscillator, and the resulting  
376 force of the striated muscle is described by an exponential function of  $y$  (Huxley and Simmons 1971).

377 A second problem is that the transition between the continuous dynamics and the reflex-type dynamics  
378 has to be formalized. Particularly, a system which simulates active relaxation of the smooth part of the  
379 adductor muscle should be formulated (Wilkins 1981). For example:

$$\begin{cases} \dot{p}_U = rp_F + dp_A \\ \dot{p}_A = -dp_A \\ \dot{p}_F = -rp_F \end{cases} \quad (21)$$

380 where  $d$  represents an active relaxation rate in  $t-1$ . Such a transition would have to be explicitly con-  
381 trolled among all other possible controls of the valve gape dynamic processes, by the nervous system.  
382 Nervous system modelling is a prolific field with many hypotheses about stimulation and signal propaga-  
383 tion (Izhikevich, 2010) which lead to a muscle contraction. Therefore, the implementation of a nervous  
384 control in our model, even if possible theoretically, would require experiments with induced stimulations,  
385 to provide relevant insights into the valve gape dynamics.

*PRE-PRINT, version 1*

386 The third problem is to determine the duration of the reflex-type dynamics, hence to control the dynamics  
387 by the individual energy consumption, since in its present form, the model [20] can sustain oscillations  
388 without limits.

389 Our last remark concerns the observed high frequency, small-scale variability in muscle contractions,  
390 superimposed onto the global dynamics. In Figure 6, the upper graphs for the two specimens 4 and 9,  
391 taken as examples, show global gape angular velocity, while the lower graphs show the detailed small-  
392 scale variability around the null velocity (velocity =  $0.0 \pm 0.7 \text{ }^\circ \cdot \text{s}^{-1}$ ). The global pattern reveals peaks  
393 with average velocities close to the values determined for parameter K; the average velocity value for  
394 specimen 4 was slightly higher than that for specimen 9 (ca.  $15 \text{ }^\circ \cdot \text{s}^{-1}$  vs. ca.  $12 \text{ }^\circ \cdot \text{s}^{-1}$ , respectively). In  
395 contrast, the small-scale variability (lower figures for each specimen) differed markedly from the global  
396 pattern and from one specimen to the other; particular patterns of intervalve micro-contractions were  
397 observed, which are consistent with micro-closure events already observed in other studies (Comeau  
398 et al. 2019). These events were hypothesized to be caused by irritating substances present in the pallial  
399 cavity (Galtsoff 1964), such as the presence of toxic algae. In general, micro-contractions are usually  
400 attributed to external factors (Comeau et al. 2019). In our experimental system, water input quality was  
401 controlled during the measurement period. Thus, without excluding causes that were unintended and not  
402 monitored, we hypothesize that these micro-contractions were produced in response to internal factors  
403 and they may reveal physiological processes, *i.e.*, calcification events along the shell edge. It will be  
404 important for these micro-contractions to be characterized comprehensively in future studies.



PRE-PRINT, version 1

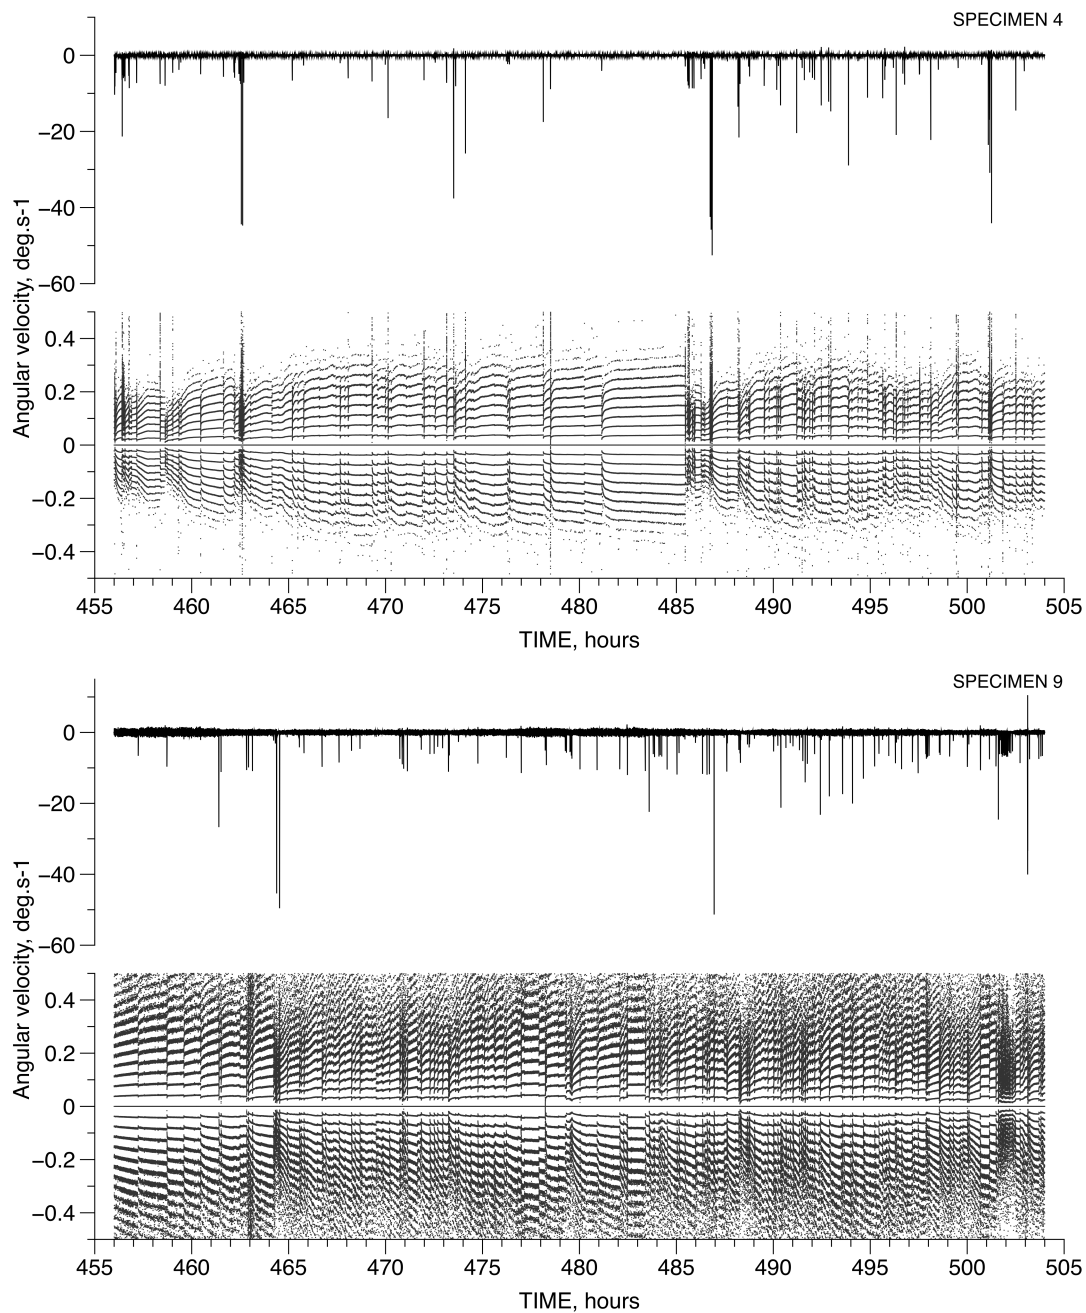

**Figure 6:** High frequency, small amplitude dynamics of inter-valve closures and openings compared to a global pattern. These variations were estimated according to angular velocity variations, which showed changes in acceleration. These changes were interpreted as periods of rapid contraction and slower relaxation. The upper two graphs represent results for specimen 4 and the lower two graphs, for specimen 9. For each series of two graphs, the upper one represents the global pattern (on the full range of velocity) and the lower one, the small-scale variability around the null velocity ( $0.0 \pm 0.7 \text{ } ^\circ \cdot \text{s}^{-1}$ ). More discrete contractions and a particular pattern can be observed at small scale compared to the global scale; they are therefore characterized as micro-contractions superimposed on the macro-scale pattern and may reflect physiological processes.

*PRE-PRINT, version 1*

## 405 **5 Conclusions**

406 The model developed here for *Pecten maximus* is an important step forward for the prediction of valve  
407 opening dynamics from forces generated by the smooth adductor muscle. The model simulates valve  
408 dynamics described by a series of continuous convergences to an equilibrium state, interspersed with  
409 random discrete closing events. This outcome provides a perspective to exploit valve movements as indi-  
410 cators of the health of bivalve organisms. It remains to consider how to quantify the neurophysiological  
411 control of muscle activity in such a way that external and internal stimuli could modulate the activation  
412 or deactivation of the adductor muscle fibers. Model expansion should also integrate chemical cues for  
413 the nervous system controlling the adductor muscle. This will permit combining the biophysical system  
414 with estimates of the physiological capacities of the organisms. The biophysical model should then be  
415 enriched with biochemical processes using the initial model formulated by Wexler et al. (1997) with  
416 Ding et al. (2000) modifications to account for the physiological state of the adductor muscle. However,  
417 further model development will require ancillary *ad hoc* measurements in order to identify parameters  
418 and processes that control the dynamics of resulting systems. Therefore, two research paths can be  
419 identified with two different goals and perspectives. First, laboratory experimentation associated with  
420 new model development should increase our understanding of ecophysiological mechanisms. Second,  
421 *in situ* monitoring of bivalve behavior can be linked more closely to the model describing valve gape  
422 dynamics through data assimilation methods. This will permit optimal forecasts in real time, improving  
423 environmental impact and monitoring programs in return.

## 424 **Data and Code accessibility**

425 This text is omitted for the preprint.

## 426 **Acknowledgements**

427 This text is omitted for the preprint.

PRE-PRINT, version 1

## 428 **Competing interests**

429 This text is omitted for the preprint.

## 430 **References**

431 Bayliss LE, Boyland E, Ritchie AD. 1930 The adductor mechanism of Pecten. *Proc. R. Soc. B*, **106**,  
432 363-376.

433 Böl M, Stark H, Schilling N. 2011 On a phenomenological model for fatigue effects in skeletal muscles.  
434 *J. Theor. Biol.*, **281**, 122–132.

435 Chantler PD. 2006 Scallop Adductor Muscles: Structure and Function. In: SE Shumway (ed). *Scallops:*  
436 *Biology, Ecology and Aquaculture*. *Developments in Aquaculture and Fisheries Science*, **35**, 229-316.

437 Clements JC, Comeau LA. 2019 Use of High-Frequency Non-invasive Electromagnetic Biosensors to  
438 Detect Ocean Acidification Effects on Shellfish Behavior. *J. Shellfish Res.*, **38(3)**, 811-818.

439 Comeau LA, Mayrand E, Mallet A. 2012 Winter quiescence and spring awakening of the Eastern oyster  
440 *Crassostrea virginica* at its northernmost distribution limit. *Mar. Biol.*, **159**, 2269-2279.

441 Comeau LA, Babarro JMF, Longa A, Padin XA. 2018 Valve-gaping behavior of raft-cultivated mussels  
442 in the Ría de Arousa, Spain. *Aquaculture Reports*, **9**, 68-73.

443 Comeau LA, Babarro JMF, Riobo P, Scarratt M, Starr M, Tremblay R. 2019 PSP-producing dinoflagellate  
444 *Alexandrium minutum* induces valve microclosures in the mussel *Mytilus galloprovincialis*. *Aquaculture*,  
445 **500**, 407-413.

446 Ding J, Wexler A, Binder-Macleod S. 2000 A predictive model of fatigue in human skeletal muscles. *J.*  
447 *App. Phys.*, **89**, 1322–1332.

448 Gainey LF, Shumway SE. 1988 A compendium of the responses of bivalve mollusks to toxic dinoflagel-  
449 lates. *J. Shellfish Res.*, **7**, 623–628.

450 Galtsoff PS. 1964 The American oyster *Crassostrea virginica* Gmelin. *U.S. Fish Wildlife Serv. Fish.*

*PRE-PRINT, version 1*

451 *Bull.*, **64**, 1–480.

452 Guarini JM, Coston-Guarini J, Comeau, LA. 2020 Calibrating Hall-Effect valvometers accounting for  
453 electromagnetic properties of the sensor and dynamic geometry of the bivalves shell. *BioRxiv*. doi:  
454 <https://doi.org/10.1101/2020.12.20.423648>

455 Guderley H, Portner HO. 2010 Metabolic power budgeting and adaptive strategies in zoology: examples  
456 from scallops and fish. *Can. J. Zool.*, **88**, 753–763.

457 Huxley AF, Simmons RM. 1971 Proposed mechanism of force generation in striated muscle. *Nature*,  
458 **233**, 533-538.

459 Izhikevich EM. 2010 *Dynamical Systems in Neuroscience: The Geometry of Excitability and Bursting*.  
460 Computational Neuroscience Series. The MIT Press Cambridge, Massachusetts; London, England. 464  
461 pages.

462 Kramer KJM, Jenner HA, Dick de Zwart D. 1989 The valve movement response of mussels: a tool in  
463 biological monitoring. *Hydrobiologia*, **188/189**, 433-443.

464 Liu JZ, Brown RW, Guang HY. 2002 A Dynamical Model of Muscle Activation, Fatigue, and Recovery.  
465 *Biophys. J.*, **82**, 2344–2359.

466 Looft MJ, Herkert N, Frey-Law L. 2018 Modification of a three-compartment muscle fatigue model to  
467 predict peak torque decline during intermittent tasks. *J. Biomechanics*, **77**, 16–25.

468 MacDonald BA, Bricelj VM, Shumway SE. 2006 Physiology: Energy Acquisition and Utilisation. In:  
469 SE Shumway (ed). *Scallops: Biology, Ecology and Aquaculture*. Developments in Aquaculture and  
470 Fisheries Science, **35**, 417-492.

471 Marceau F. 1909 Recherche sur la morphologie, et l'histologie, et la physiologie compares des muscles  
472 adducteurs des mollusques acéphales. *Arch. Zool. Exp. Gen.*, **5(2)**, 295-469.

473 Nagai K, Honjo T, Go J, Yamashita H, Oh SJ. 2006 Detecting the shellfish killer *Heterocapsa circular-*  
474 *isquama* (Dinophyceae) by measuring bivalve valve activity with a Hall element sensor. *Aquaculture*,

*PRE-PRINT, version 1*

475 **255**, 395–401.

476 Nelder VA, Mead R. 1965 A Simplex method for function minimization. *Computer J.*, **7**, 308-13.

477 Payton L, Sow M, Massabuau J-C, Ciret P, Tran D. 2017 How annual course of photoperiod shapes  
478 seasonal behavior of diploid and triploid oysters, *Crassostrea gigas*. PLoS ONE, **12(10)**, e0185918.

479 Rao KP. 1954 Tidal rhythmicity of rate of water propulsion in *Mytilus californianus* and its modifiability  
480 by transplantation. *Biol. Bull.*, **43**, 283–293.

481 Redmond KJ, Berry M, Pampanin DM, Andersen OK. 2017 Valve gape behaviour of mussels (*Mytilus*  
482 *edulis*) exposed to dispersed crude oil as an environmental monitoring endpoint. *Mar. Poll. Bull.*, **117**,  
483 330–339.

484 Wexler A, Ding J, Binder-Macleod S. 1997 A mathematical model that predicts skeletal muscle force.  
485 *IEEE Transactions on Biomedical Engineering*, **44**, 337–348.

486 Wilkens LA. 1981 Neurobiology of the scallop. I. Starfish-mediated escape behaviours. *Proc. R. Soc. of*  
487 *London B*, **211**, 341-372.

488 Wilkens LA. 2006 Neurobiology and behaviour of the scallop. In: SE Shumway (ed). *Scallops: Biology,*  
489 *Ecology and Aquaculture. Developments in Aquaculture and Fisheries Science*, **35**, 317-356.
